# Supplementary material for: Improving health worker performance through text messaging: A mixed-methods evaluation of a pilot intervention designed to increase coverage of intermittent preventive treatment of malaria in pregnancy in West Nile, Uganda
Source: PubMed Central journal article supplement (PMC6126848; doi:10.1371/journal.pone.0203554), 2018-09-06
Supplement: pone.0203554.s005.pdf [file pone.0203554.s005.pdf]

## Training participants' evaluation questionnaire

Dates of the training \_\_\_\_\_

District in which training done \_\_\_\_\_

Please rate the below aspects of the training by ticking one of the boxes from Excellent (5) to Very poor (1). This questionnaire is completely anonymous.

|                                                                                                           | Excellent | Good | Neutral | Poor | Very poor |
|-----------------------------------------------------------------------------------------------------------|-----------|------|---------|------|-----------|
|                                                                                                           | 5         | 4    | 3       | 2    | 1         |
| The overall quality of the training                                                                       |           |      |         |      |           |
| The content of the training                                                                               |           |      |         |      |           |
| The way in which the trainer led the training sessions and how they taught the information                |           |      |         |      |           |
| Availability of the materials needed for the training (stationary, manuals etc.)                          |           |      |         |      |           |
| The venue for the training sessions (its appropriateness for the training and the number of participants) |           |      |         |      |           |
| The food and refreshments provided                                                                        |           |      |         |      |           |

Please leave any other general comments or thoughts

---



---



---



---
